# Supplementary material for: Clinical characteristics and treatment response of a possible self-contamination subtype of obsessive-compulsive disorder: a prospective investigation
Source: Research Square preprint supplement (doi:10.21203/rs.3.rs-5073976/v1), 2024-11-29
Supplement: Supplementary file 1 [file 4da7711a2559cc9fbd78906b.xlsx]

## Sheet: Sheet1
table 1. demographic
M±SD or n (%)	contaminated (A)	self-contamination (B)	checking (C)	p value	multiple comparison
sex(male/ female)	6/19	4/11	18/13	< 0.05
age	29.0 ± 6.3	27.5 ± 8.5	30.1 ± 10.6	0.651
onset age	22.2 ± 5.5	19.3 ± 6.1	22.9 ± 9.5	0.314
duration of illness	6.7 ± 4.2	8.3 ± 6.5	7.2 ± 5.4	0.654
education year	13.0 ± 2.2	10.8 ± 2.4	13.8 ± 2.5	< 0.01	B < A, C
YBOCS	29.6 ± 4.2	31.1 ± 4.1	28.7 ± 4.9	0.413
SDS	48.3 ± 9.7	54.2 ± 7.8	46.8 ± 9.8	0.067
state score of STAI	51.4 ± 9.3	60.1 ± 7.9	49.1 ± 10.2	< 0.01	A, C < B
trait score of STAI	52.6 ± 10.8	62.9 ± 8.3	52.5 ± 11.3	< 0.05	A, C < B
LSAS	52.4 ± 15.0	77.6 ± 5.7	52.4 ± 17.1	< 0.01	A, C < B
performance	27.7 ± 8.2	34.3 ± 5.1	26.8 ± 9.8	< 0.05	C < B
social interaction	24.7 ± 7.8	43.3 ± 5.6	26.8 ± 9.8	< 0.01	A, C < B
QOL	2.7 ± 0.5	2.3 ± 0.5	2.8 ± 0.6	< 0.05	B < C
GAF	48.7 ± 5.9	45.1±6.2	51.2±5.8	< 0.05	B < C
MDD	13 (52.0)	13(86.7)	14(45.2)	< 0.05
PD	9(36.0)	8(53.3)	3(9.7)	< 0.01
GAD	4(16.0)	7(46.7)	1(3.2)	< 0.01
SAD	3(12.0)	11(73.3)	4(12.9)	< 0.01
BDD	1(4.0)	9(60.0)	3(9.7)	< 0.01
ORD	1(4.0)	6(40.0)	0(0.0)	< 0.01
PTSD	1(4.0)	1(6.7)	0(0.0)	0.402
poor insight	13(52.0)	13(86.7)	9(29.0)	< 0.05
involvement	10(40.0)	13(86.7)	10(32.3)	< 0.01
social withdrawal	2(8.0)	12(80.0)	1(3.2)	< 0.01
Tic related	5(23.8)	4(30.8)	5(20.0)	0.76
family history of OCD	5(20.0)	8(53.3)	5(17.2)	< 0.05
hoarding symptom	6(25.0)	6(42.9)	7(24.1)	0.399
* p＜0.05, * *p＜0.01 Analysis of variance for continuous variables, χ2 test for categorical variables. YBOCS: Yale-Brown Obsessive-Compulsive Scale; SDS: Self-rating Depression Scale; STAI:State-Trait Anxiety Inventory; LSAS: Liebowitz Social Anxiety Scale; QOL: World Health. Organization Quality of Life 26; GAF: The Global Assessment of Functioningan; MDD: Major Depressive Disorder; PD: Panic Dis…
