# Supplementary material for: Clinical characteristics and treatment response of a possible self-contamination subtype of obsessive-compulsive disorder: a prospective investigation
Source: Research Square preprint supplement (doi:10.21203/rs.3.rs-5073976/v1), 2024-11-29
Supplement: Supplementary file 2 [file 65745a46760223b4593b24be.xlsx]

## Sheet: Sheet1
table 2 Predictive factors of treatment response in patients with OCD using regresion analysis
	model 1						model 2						model 3						model 4
variable	β	p	95% CI				β	p	95% CI				β	p	95% CI				β	p	95% CI
YBOCS score at intake	0.422	< 0.001	0.313	-	1.061		0.35	0.003	0.206	-	0.933		0.321	0.004	0.172	-	0.872		0.328	0.003	0.193	-	0.873
SDS score at intake							0.319	0.006	0.074	-	0.425		0.295	0.008	0.063	-	0.399		0.217	0.054	0.00	-	0.343
duration of illness													0.274	0.012	0.087	-	0.671		0.303	0.005	0.133	-	0.705
prevalence of ORS																			0.232	0.035	0.456	-	12.242
R2	0.178						0.275						0.348						0.396
F for changes in R2	0.165	**					0.251	**					0.315	**					0.355	**
* p＜0.05, * *p＜0.01 Dependent variable: YBOCS score at one-year treatment. YBOCS: Yale-Brown Obsessive-Compulsive Scale; SDS: Self-rating Depression Scale; ORS: Olfactory Reference Disorder.
